# Supplementary material for: Characterization of Urine Stem Cell-Derived Extracellular Vesicles Reveals B Cell Stimulating Cargo
Source: PubMed Central journal article supplement (PMC7796485; doi:10.3390/ijms22010459), 2021-01-05
Supplement: ijms-22-00459-s001.pdf [file ijms-22-00459-s001.pdf]

# Characterization of Urine Stem Cell-Derived Extracellular Vesicles Reveals B Cell Stimulating Cargo

Asmaa A. Zidan <sup>1,2,3</sup>, Mohammed Al-Hawwas <sup>1</sup>, Griffith B. Perkins <sup>4</sup>, Ghada M. Mourad <sup>2,3</sup>, Catherine J.M. Stapledon <sup>5</sup>, Larisa Bobrovskaya <sup>1</sup>, Xin-Fu Zhou <sup>1,\*</sup> and Plinio R. Hurtado <sup>6,7</sup>

## Supplementary Figures

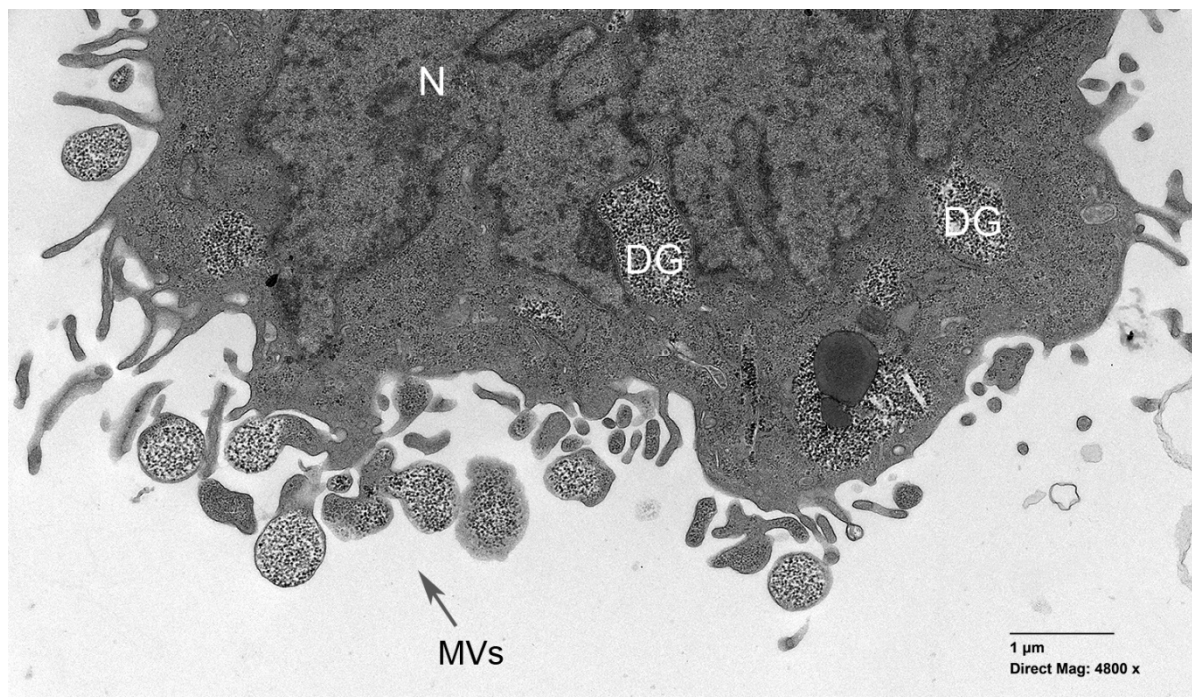

### Supplementary Figure S1. USC Budding of Dense Granules Loaded-Micro-Vesicles

EM of USC showing large euchromatic nucleus (N), pools of dense granules (DG) and secretory surface with the budding of micro-vesicles (MVs) loaded with dense granular material of similar density to the cytoplasmic granules (DG), (Mic. Mag. ×4800, Scale bar = 1μm, Lead citrate / Uranyl acetate stain)

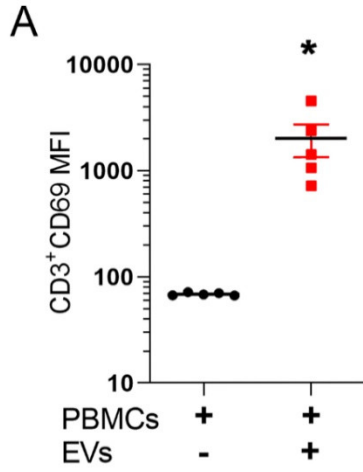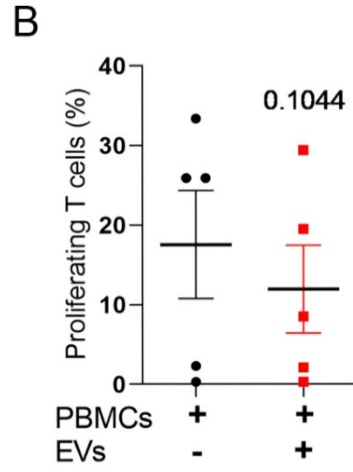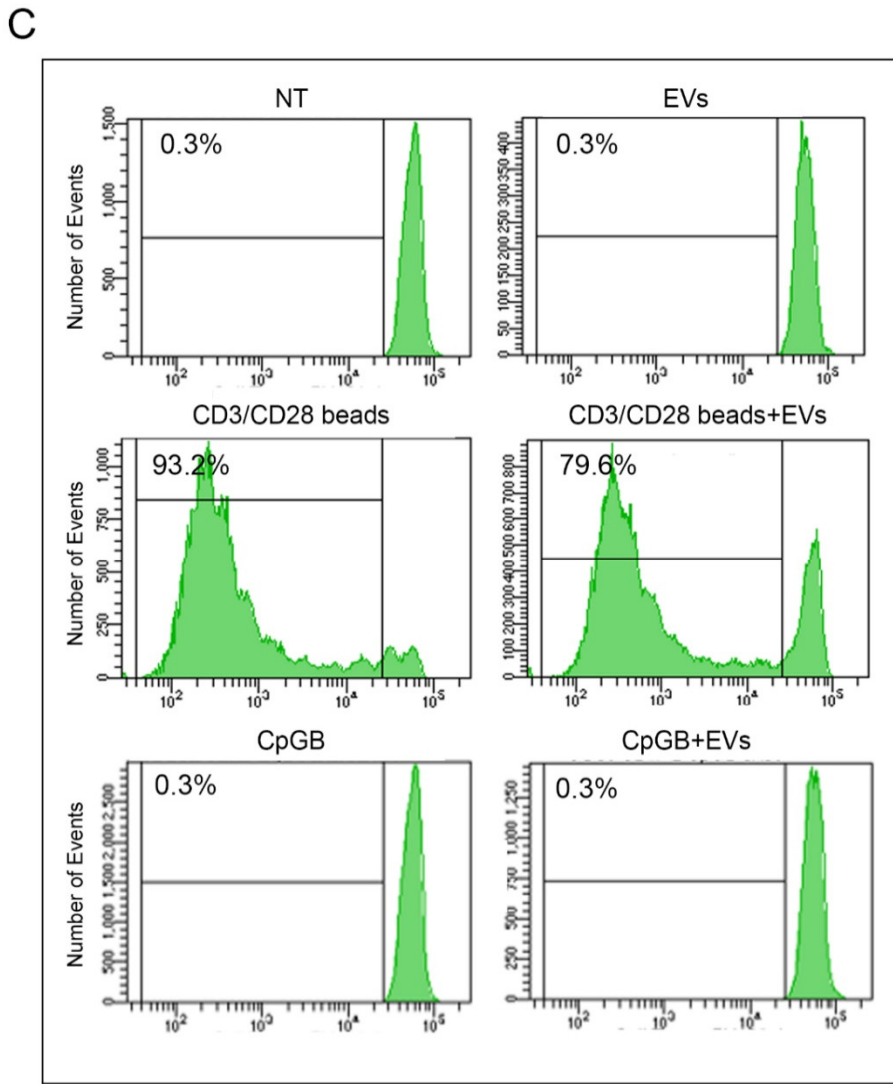

D

|         | CD3 <sup>+</sup> T cells (%) |                   | CD19 <sup>+</sup> B cells (%) |                 |
|---------|------------------------------|-------------------|-------------------------------|-----------------|
|         | Resting                      | CD3/28 stimulated | Resting                       | CpGB stimulated |
| Control | 12.5 ± 6.7                   | 72.6±7.3          | 5.2±3.4                       | 52±10           |
| EVs     | 11.97±5.504                  | 49.8±4.7          | 26.9±5.4                      | 79±6.4          |

**Supplementary Figure S2. T Cell Activation and Proliferation Assay**

(A) The expression of CD69 (early activation marker) on the T cell population of PBMC shows increased expression in the presence of EVs ( $n = 5$ ). (B) Effect of the EVs on the proliferation of T cells showing nonsignificant enhancement of proliferation in response to EVs co-culture ( $n = 5$ ). P values were determined using a paired *t*-test.

(C) **Representative sample of CFSE** proliferation analysis of CD3<sup>+</sup> T cells in response to 10 µg/mL EVs incubation with PBMC for five days was conducted using flow cytometry with calculating the percentage of divided T cells in a resting state (A, **Top panel left**) and in the presence of EVs (A, **Top panel right**), in the presence of anti-CD3/CD28 beads for T cells (A, **middle panel left**) and in the presence of CD3/CD28 beads and EVs (A, **Middle panel right**). Finally, in the presence of CpGB stimulation for B cells (Lower panel left) and CpGB and EVs (A, **the Lower panel right**). EVs did not seem to have an effect on T cell proliferation in resting and CpGB stimulated states; however, it decreased the % of divided in the presence of anti-CD3/CD28 beads.

The experiments were repeated at least twice using different samples.

(D) The effect of EVs on the proliferation of B and T cells of PBMCs presented by Mean ± SEM ( $n=5$ ).

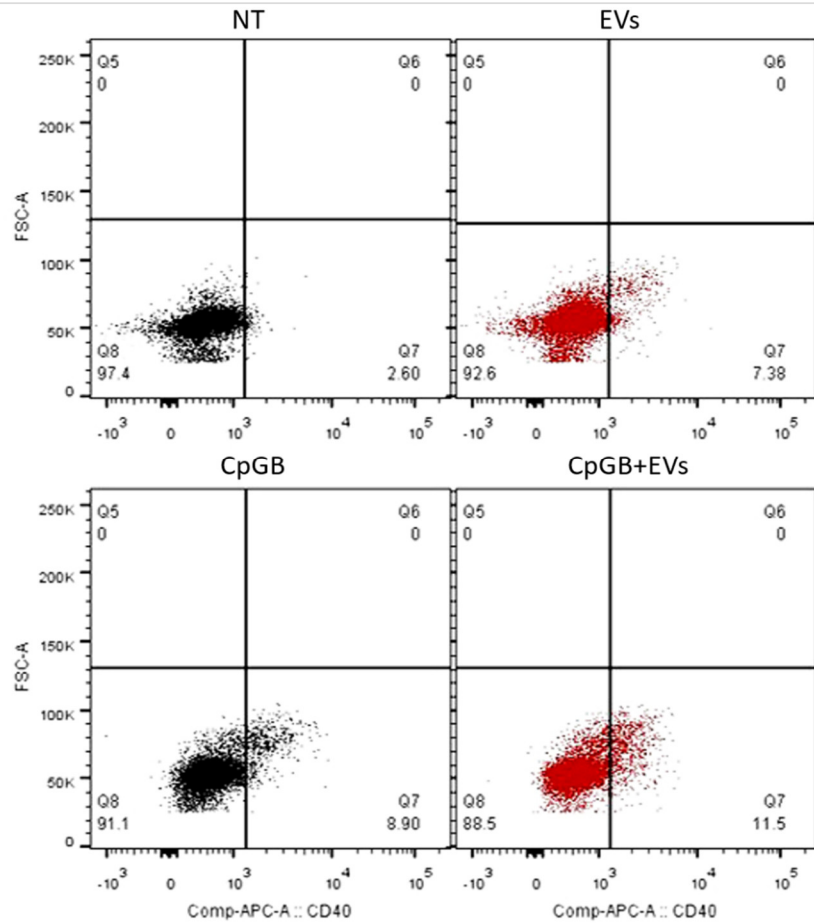

**Supplementary Figure S3. CD40 Expression on B cells in response to EVs (Representative sample)**  
 Flow cytometry analysis of the expression of the co-stimulatory molecule CD40 on the surface of B cells after 24 h of cultures either alone (**Upper panel left**) or in the presence of 10 µg/mL EVs (**Upper panel right**). The lower left quadrants of both panels show CD40<sup>+</sup> B cells, showing an increase of CD40 expression 2.6% to 7.38% (873.86 vs. 1403.4 MFI) in B cells. Lower panel show CD40 expression by B cells in the presence of CpGB (**Bottom panel left**) and in the presence of CpGB and EVs (**Bottom panel right**). CpGB induce a expression of CD40 in B cells, compared to the expression in their resting state (2.60% vs. 11.5%), but the presence of EVs further increase CD40 expression from 8.9% to 11.5 % (1709.17 vs. 1900 MFI). The experiment was repeated twice.

**A**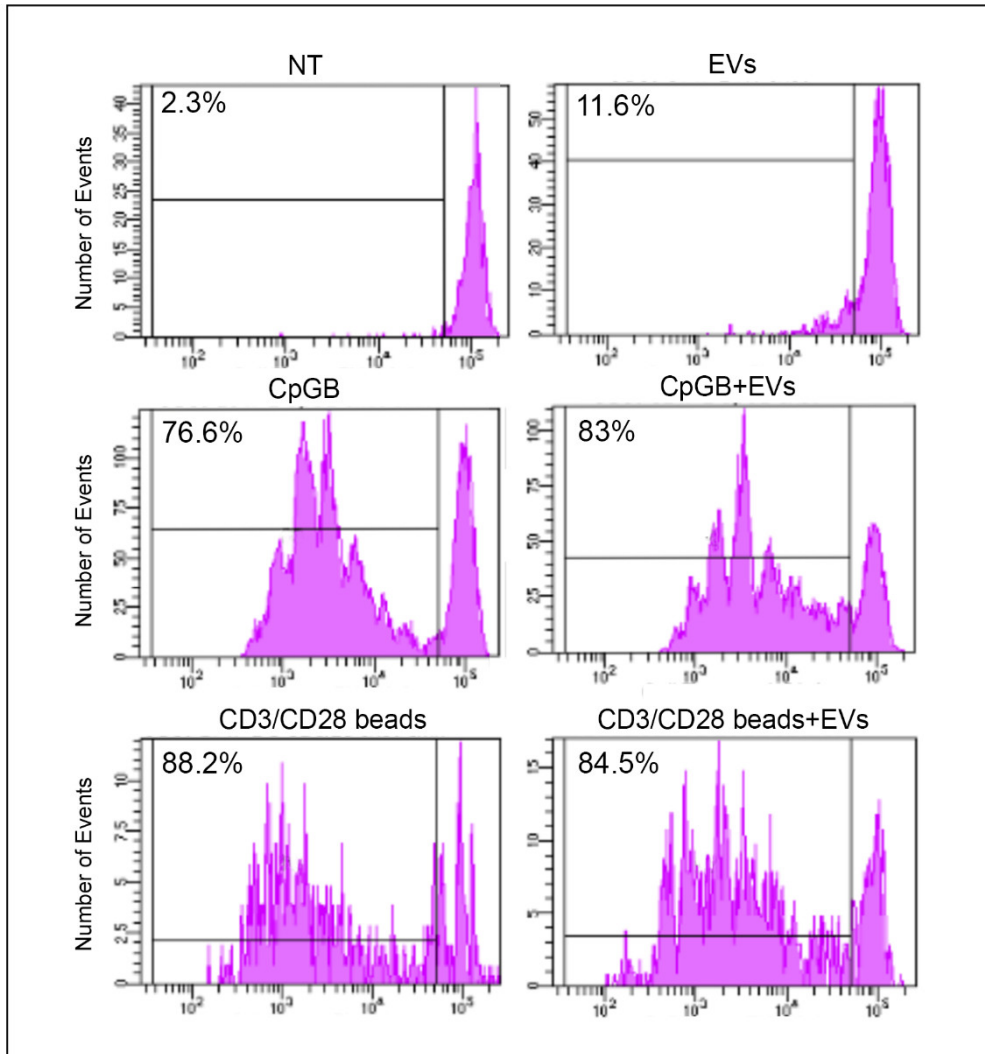**B**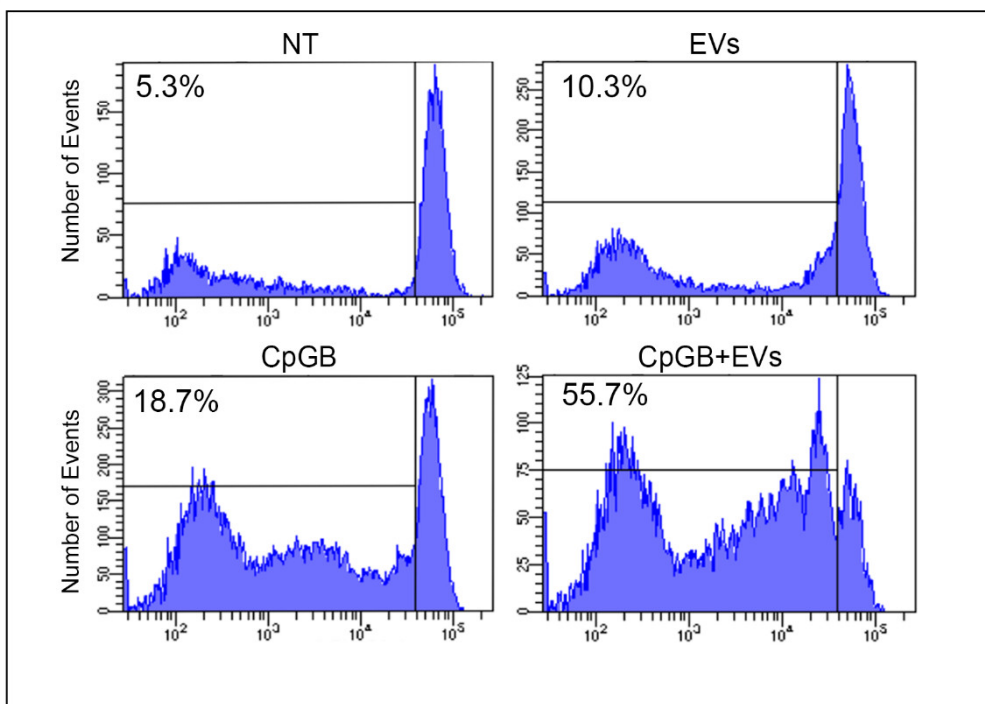

**Supplementary Figure S4. B cells Proliferation Assay (Representative sample)**

CFSE proliferation analysis of B cells in response to 10 µg/mL EVs incubation with either (A) PBMCs or (B) isolated B cell for five days was conducted using flow cytometry with calculating the percentage of divided B cells in each.

(A) CD19<sup>+</sup> B cells proliferation analysis of PBMC cultured either alone (A, **Top panel left**) or in the presence of EVs (A, **Top panel right**), Cultured in the presence of CpGB alone (A, **Middle panel left**) or in the presence of both, CpGB and EVs (A, **Middle panel right**) and finally, in the presence of anti-CD3/CD28 beads alone (A, **Bottom panel left**) or in the presence of anti-CD3/CD28 beads and EVs (A, **Bottom panel right**). EVs induced a B cells proliferative response (2.3 vs. 11.6%), compared to B cells in resting state, CpGB induced a strong proliferation of B cells (2.3 vs. 76.6%), which further increased in the presence of EVs (76.6 vs. 83%). Stimulation of T cells in the presence of anti-CD3/CD28 beads also induced strong B cell proliferation (2.3 vs. 88.2%); however, the presence of EVs discretely decrease this proliferation (88.2% vs. 84.5%).

(B) Experiment performed with purified B cells co-culture either alone (B, **Top panel left**) or with EVs (B, **Top panel right**) and in the presence of CpGB alone (B, **Bottom panel left**) or in the presence of CpGB and EVs (B, **Bottom panel right**). EVs had a proliferative effect on purified B cells (5.2 vs. 10.3%). CpGB also had a proliferative effect (5.2 vs. 18.7%), and EVs had a strong synergistic proliferative effect with CpGB (18.7 vs. 55.7%).

The experiments were repeated at least twice using different samples.

## Supplementary Tables

**Supplementary Table S1: Monoclonal Antibodies**

| Antibody                             | Fluorochrome Label | Provider                             | Cat. No.    |
|--------------------------------------|--------------------|--------------------------------------|-------------|
| <i>USCs Characterization:</i>        |                    |                                      |             |
| CD73                                 | PE-Cy7*            | BD, Franklin Lakes, NJ, USA          | 561258      |
| CD105                                | PE*                | eBioscience, San Diego, CA, USA      | 12-1057-73  |
| CD14                                 | PE                 | BD, Franklin Lakes, NJ, USA          | 347497      |
| CD34                                 | PE-Cy7             | BD, Franklin Lakes, NJ, USA          | 560710      |
| CD45                                 | PE                 | BD, Franklin Lakes, NJ, USA          | 555483      |
| HLA-DR                               | PE-Cy7             | BD, Franklin Lakes, NJ, USA          | 335795      |
| CD154                                | ..                 | BD, Franklin Lakes, NJ, USA          | 552559      |
| BAFFR(CD268)                         | ..                 | Biologend, San Diego, CA USA         | 316902      |
| <i>Lymphocytes Study:</i>            |                    |                                      |             |
| CD3                                  | APC-eFlour780      | eBioscience, San Diego, CA, USA      | 47-0038-42  |
| CD19                                 | FITC*              | BD, Franklin Lakes, NJ, USA          | 555412      |
| CD40                                 | PE-Cy7             | BD, Franklin Lakes, NJ, USA          | 561215      |
| CD69                                 | PE                 | BD, Franklin Lakes, NJ, USA          | 555531      |
| <i>1ry Anti-bodies</i>               |                    |                                      |             |
| CD63                                 |                    | SCBT, Dallas, TX, USA                | MX-49.129.5 |
| CD81                                 |                    | SCBT, Dallas, TX, USA                | SC-9158     |
| TSG101                               |                    | Abcam, Cambridge, UK                 | AB30871     |
| Alpha cytochrome C                   |                    | CST, Danvers, MA, USA                | D18C7       |
| <i>2ry Anti-bodies</i>               |                    |                                      |             |
| IRDye® 680 RD Donkey anti-Rabbit IgG |                    | LI-COR Biosciences, Lincoln, NE, USA | 926-68073   |
| IRDye® 800CW Goat anti-Mouse IgG     |                    | LI-COR Biosciences, Lincoln, NE, USA | 926-32210   |
| Goat anti-mouse IgG-AlexaFlour 488   |                    | Invitrogen, Waltham, MA, USA         | A32723      |
| Antimouse IgG-AlexaFlour 647         |                    | Invitrogen, Waltham, MA, USA         | A-21235     |
| Aurion Goat anti-mouse IgG           |                    | ProSciTech, Queensland, Au           | JA806-022   |

\* PE-Cy7=Phycoerythrin-Cyanine7, PE= Phycoerythrin, FITC= fluorescein isothiocyanate.

**Supplementary Table S2: Differentiation Induction Media:**

| <b>Material</b>                                  | <b>Concentration</b>                                | <b>Provider</b>                   |
|--------------------------------------------------|-----------------------------------------------------|-----------------------------------|
| <i>Osteogenic Induction Media:</i>               |                                                     |                                   |
| DMEM                                             | High glucose                                        | Lonza, Basel, Switzerland         |
| FBS                                              | 10%                                                 | Gibco, Waltham, MA, USA           |
| P/S                                              | 100 U/mL of Penicillin<br>100 µg/mL of Streptomycin | Gibco, Waltham, MA, USA           |
| Sodium B-glycerophosphate                        | 10 mM                                               | Sigma-Aldrich, St. Louis, MO, USA |
| Dexamethasone                                    | 100 nM                                              | Sigma-Aldrich, St. Louis, MO, USA |
| Ascorbic Acid                                    | 0.05 mM                                             | Sigma-Aldrich, St. Louis, MO, USA |
| <i>Osteoblast detection</i>                      |                                                     |                                   |
| Paraformaldehyde                                 | 4%                                                  | Sigma-Aldrich, St. Louis, MO, USA |
| Alizarin Red stain                               | 2 gm/100 mL distilled water                         | Sigma-Aldrich, St. Louis, MO, USA |
| <i>Adipogenic Induction Media:</i>               |                                                     |                                   |
| DMEM                                             |                                                     | Lonza, Basel, Switzerland         |
| FBS                                              | 10%                                                 | Gibco, Waltham, MA, USA           |
| P/S                                              | 100 U/mL of Penicillin<br>100 µg/mL of Streptomycin | Gibco, Waltham, MA, USA           |
| Dexamethasone                                    | 1 mM                                                | Sigma-Aldrich, St. Louis, MO, USA |
| isobutylmethylxanthine                           | 0.5 mM                                              | Sigma-Aldrich, St. Louis, MO, USA |
| indomethacin                                     | 50 µM                                               | Sigma-Aldrich, St. Louis, MO, USA |
| <i>Adipocyte detection</i>                       |                                                     |                                   |
| Paraformaldehyde                                 | 4%                                                  | Sigma-Aldrich, St. Louis, MO, USA |
| Oil Red O                                        | 1.5mg/mL 60% isopropranolol                         | Sigma-Aldrich, St. Louis, MO, USA |
| <i>Chondrogenic Induction Media:</i>             |                                                     |                                   |
| DMEM                                             | High glucose                                        | Lonza, Basel, Switzerland         |
| P/S                                              | 100 U/mL of Penicillin<br>100 µg/mL of Streptomycin | Gibco, Waltham, MA, USA           |
| Dexamethasone                                    | 100 nM                                              | Sigma-Aldrich, St. Louis, MO, USA |
| Insulin-transferrin-selenium<br>(ITS supplement) | 10%                                                 | Sigma-Aldrich, St. Louis, MO, USA |
| Ascorbic Acid                                    | 1 µg/mL                                             | Sigma-Aldrich, St. Louis, MO, USA |
| Sodium Pyruvate                                  | 1%                                                  | Sigma-Aldrich                     |
| Human Transforming Growth Factor-β1              | 10 ng/mL                                            | Sigma-Aldrich, St. Louis, MO, USA |
| <i>Chondrocyte detection</i>                     |                                                     |                                   |
| Paraformaldehyde                                 | 4%                                                  | Sigma-Aldrich, St. Louis, MO, USA |
| Toluidine Blue                                   | 1%                                                  | Sigma-Aldrich, St. Louis, MO, USA |
